# Supplementary material for: What about the Arsenic? Health Risk Assessment in Canned Tuna Commercialized in Northern Spain
Source: MDPI journal article supplement (doi:10.3390/pr11030824), 2023-03-09
Supplement: s1 [file s1]

**Table S1.** General information about samples.

| Sample | Species on label                | Genetic identity          | Fishing area                | Included in the study? | Reason                      |
|--------|---------------------------------|---------------------------|-----------------------------|------------------------|-----------------------------|
| 1      | <i>Thunnus albacares</i>        | <i>Thunnus albacares</i>  | N.A.                        | NO                     | FAO area absent             |
| 2      | <i>Thunnus albacares</i>        | <i>Thunnus albacares</i>  | N.A.                        | NO                     | FAO area absent             |
| 3      | <i>Thunnus albacares</i>        | <i>Thunnus albacares</i>  | N.A.                        | NO                     | FAO area absent             |
| 4      | <i>Thunnus albacares</i>        | <i>Thunnus albacares</i>  | N.A.                        | NO                     | FAO area absent             |
| 5      | <i>Thunnus albacares</i>        | <i>Auxis thazard</i>      | N.A.                        | NO                     | FAO area absent             |
| 6      | <i>Thunnus albacares</i>        | <i>Thunnus albacares</i>  | N.A.                        | NO                     | FAO area absent             |
| 7      | <i>Thunnus albacares</i>        | <i>Thunnus albacares</i>  | N.A.                        | NO                     | FAO area absent             |
| 8      | <i>Atún Claro</i>               | <i>Thunnus albacares</i>  | N.A.                        | NO                     | FAO area absent             |
| 9      | <i>Atún Claro</i>               | <i>Thunnus albacares</i>  | N.A.                        | NO                     | FAO area absent             |
| 10     | <i>Atún Claro</i>               | <i>Thunnus albacares</i>  | N.A.                        | NO                     | FAO area absent             |
| 11     | <i>Atún Claro</i>               | <i>Thunnus albacares</i>  | N.A.                        | NO                     | FAO area absent             |
| 12     | <i>Atún Claro</i>               | <i>Thunnus albacares</i>  | N.A.                        | NO                     | FAO area absent             |
| 13     | <i>Atún Claro</i>               | <i>Thunnus albacares</i>  | N.A.                        | NO                     | FAO area absent             |
| 14     | <i>Thunnus albacares/obesus</i> | <i>Thunnus albacares</i>  | FAO 71                      | YES                    | All info required           |
| 15     | <i>Thunnus albacares/obesus</i> | <i>Thunnus albacares</i>  | FAO 71                      | YES                    | All info required           |
| 16     | <i>Thunnus albacares/obesus</i> | <i>Thunnus albacares</i>  | FAO 34-47                   | NO                     | Multiple FAO areas          |
| 17     | <i>Atún Claro</i>               | <i>Thunnus albacares</i>  | FAO 71                      | YES                    | All info required           |
| 18     | <i>Atún Claro</i>               | <i>Thunnus albacares</i>  | FAO 51-71-77-87             | NO                     | Multiple FAO areas          |
| 19     | <i>Atún Claro</i>               | <i>Thunnus albacares</i>  | FAO 71                      | YES                    | All info required           |
| 20     | <i>Thunnus albacares/obesus</i> | <i>Thunnus albacares</i>  | FAO 71                      | YES                    | All info required           |
| 21     | <i>Thunnus albacares/obesus</i> | <i>Thunnus albacares</i>  | FAO 51                      | YES                    | All info required           |
| 22     | <i>Thunnus albacares/obesus</i> | <i>Thunnus albacares</i>  | FAO 71                      | YES                    | All info required           |
| 23     | <i>Thunnus albacares/obesus</i> | <i>Thunnus albacares</i>  | FAO 71                      | YES                    | All info required           |
| 24     | <i>Atún Claro</i>               | <i>Thunnus albacares</i>  | FAO 71                      | YES                    | All info required           |
| 25     | <i>Atún Claro</i>               | <i>Thunnus albacares</i>  | FAO 51                      | YES                    | All info required           |
| 26     | <i>Atún Claro</i>               | <i>Thunnus albacares</i>  | N.A.                        | NO                     | FAO area absent             |
| 27     | <i>Atún Claro</i>               | <i>Thunnus albacares</i>  | N.A.                        | NO                     | FAO area absent             |
| 28     | <i>Thunnus albacares/obesus</i> | <i>Thunnus albacares</i>  | FAO 34-47-51-57-71-77-87    | NO                     | Multiple FAO areas on label |
| 29     | <i>Thunnus albacares</i>        | <i>Thunnus albacares</i>  | FAO 77                      | YES                    | All info required           |
| 30     | <i>Thunnus albacares</i>        | <i>Thunnus albacares</i>  | FAO 51                      | YES                    | All info required           |
| 31     | <i>Thunnus obesus</i>           | <i>Thunnus albacares</i>  | FAO 77                      | YES                    | All info required           |
| 32     | <i>Thunnus albacares</i>        | <i>Thunnus albacares</i>  | FAO 71                      | YES                    | All info required           |
| 33     | <i>Thunnus albacares/obesus</i> | <i>Thunnus albacares</i>  | PAC E-East Pacific          | NO                     | Multiple FAO areas          |
| 34     | <i>Thunnus albacares/obesus</i> | <i>Thunnus albacares</i>  | PAC E-West Pacific          | NO                     | Multiple FAO areas          |
| 35     | <i>Thunnus albacares/obesus</i> | <i>Thunnus albacares</i>  | PAC E-East Pacific          | NO                     | Multiple FAO areas          |
| 36     | <i>Thunnus albacares/obesus</i> | <i>Thunnus albacares</i>  | PAC E-East Pacific          | NO                     | Multiple FAO areas          |
| 37     | <i>Thunnus albacares/obesus</i> | <i>Thunnus albacares</i>  | PAC E-East Pacific          | NO                     | Multiple FAO areas          |
| 38     | <i>Thunnus albacares/obesus</i> | <i>Thunnus albacares</i>  | PAC E-East Pacific          | NO                     | Multiple FAO areas          |
| 39     | <i>Thunnus albacares/obesus</i> | <i>Thunnus albacares</i>  | PAC E-East Pacific          | NO                     | Multiple FAO areas          |
| 40     | <i>Thunnus albacares/obesus</i> | <i>Thunnus albacares</i>  | PAC E-West Pacific          | NO                     | Multiple FAO areas          |
| 41     | <i>Katsuwonus pelamis</i>       | <i>Katsuwonus pelamis</i> | PAC W- West Central Pacific | NO                     | Multiple FAO areas          |
| 42     | <i>Katsuwonus pelamis</i>       | <i>Katsuwonus pelamis</i> | PAC W- West Central Pacific | NO                     | Multiple FAO areas          |
| 43     | <i>Katsuwonus pelamis</i>       | <i>Katsuwonus pelamis</i> | PAC W- West Central Pacific | NO                     | Multiple FAO areas          |

|    |                                                                                    |                           |                             |     |                    |
|----|------------------------------------------------------------------------------------|---------------------------|-----------------------------|-----|--------------------|
| 44 | <i>Katsuwonus pelamis</i>                                                          | <i>Katsuwonus pelamis</i> | PAC W- West Central Pacific | NO  | Multiple FAO areas |
| 45 | <i>Katsuwonus pelamis</i>                                                          | <i>Katsuwonus pelamis</i> | PAC W- West Central Pacific | NO  | Multiple FAO areas |
| 46 | <i>Katsuwonus pelamis</i>                                                          | <i>Katsuwonus pelamis</i> | PAC W- West Central Pacific | NO  | Multiple FAO areas |
| 47 | <i>Katsuwonus pelamis</i>                                                          | <i>Katsuwonus pelamis</i> | PAC W- West Central Pacific | NO  | Multiple FAO areas |
| 48 | <i>Katsuwonus pelamis</i>                                                          | <i>Katsuwonus pelamis</i> | PAC W- West Central Pacific | NO  | Multiple FAO areas |
| 49 | <i>Katsuwonus pelamis</i>                                                          | <i>Katsuwonus pelamis</i> | PAC W- West Central Pacific | NO  | Multiple FAO areas |
| 50 | <i>Katsuwonus pelamis</i>                                                          | <i>Katsuwonus pelamis</i> | PAC W- West Central Pacific | NO  | Multiple FAO areas |
| 51 | <i>Katsuwonus pelamis</i> /<br><i>Thunnus obesus</i> /<br><i>Thunnus albacares</i> | <i>Katsuwonus pelamis</i> | FAO 71                      | YES | All info required  |
| 52 | <i>Katsuwonus pelamis</i> /<br><i>Thunnus obesus</i> /<br><i>Thunnus albacares</i> | <i>Katsuwonus pelamis</i> | FAO 71                      | YES | All info required  |
| 53 | <i>Katsuwonus pelamis</i> /<br><i>Thunnus obesus</i> /<br><i>Thunnus albacares</i> | <i>Katsuwonus pelamis</i> | FAO 71                      | YES | All info required  |
| 54 | <i>Katsuwonus pelamis</i> /<br><i>Thunnus obesus</i> /<br><i>Thunnus albacares</i> | <i>Katsuwonus pelamis</i> | FAO 34                      | YES | All info required  |
| 55 | <i>Katsuwonus pelamis</i> /<br><i>Thunnus obesus</i> /<br><i>Thunnus albacares</i> | <i>Katsuwonus pelamis</i> | FAO 71                      | YES | All info required  |
| 56 | <i>Katsuwonus pelamis</i>                                                          | <i>Katsuwonus pelamis</i> | N.A.                        | NO  | FAO area absent    |
| 57 | <i>Katsuwonus pelamis</i>                                                          | <i>Katsuwonus pelamis</i> | FAO 34                      | YES | All info required  |
| 58 | <i>Katsuwonus pelamis</i>                                                          | <i>Katsuwonus pelamis</i> | FAO 34                      | YES | All info required  |
| 59 | <i>Katsuwonus pelamis</i>                                                          | <i>Katsuwonus pelamis</i> | FAO 34                      | YES | All info required  |
| 60 | <i>Katsuwonus pelamis</i>                                                          | <i>Katsuwonus pelamis</i> | FAO 34                      | YES | All info required  |
| 61 | <i>Thunnus alalunga</i>                                                            | <i>Thunnus alalunga</i>   | FAO 77                      | YES | All info required  |
| 62 | <i>Thunnus alalunga</i>                                                            | <i>Thunnus alalunga</i>   | N.A.                        | NO  | FAO area absent    |
| 63 | <i>Thunnus alalunga</i>                                                            | <i>Thunnus alalunga</i>   | N.A.                        | NO  | FAO area absent    |
| 64 | <i>Thunnus alalunga</i>                                                            | <i>Thunnus alalunga</i>   | N.A.                        | NO  | FAO area absent    |
| 65 | <i>Thunnus alalunga</i>                                                            | <i>Thunnus alalunga</i>   | FAO 67, 71, 77, 81          | NO  | Multiple FAO areas |
| 66 | <i>Thunnus alalunga</i>                                                            | <i>Thunnus alalunga</i>   | N.A.                        | NO  | FAO area absent    |
| 67 | <i>Thunnus alalunga</i>                                                            | <i>Thunnus alalunga</i>   | N.A.                        | NO  | FAO area absent    |
| 68 | <i>Thunnus alalunga</i>                                                            | <i>Thunnus alalunga</i>   | N.A.                        | NO  | FAO area absent    |
| 69 | <i>Thunnus alalunga</i>                                                            | <i>Thunnus alalunga</i>   | N.A.                        | NO  | FAO area absent    |
| 70 | <i>Thunnus alalunga</i>                                                            | <i>Thunnus alalunga</i>   | N.A.                        | NO  | FAO area absent    |
| 71 | <i>Thunnus alalunga</i>                                                            | <i>Thunnus alalunga</i>   | N.A.                        | NO  | FAO area absent    |
| 72 | <i>Thunnus alalunga</i>                                                            | <i>Thunnus alalunga</i>   | N.A.                        | NO  | FAO area absent    |
| 73 | <i>Thunnus alalunga</i>                                                            | <i>Thunnus alalunga</i>   | N.A.                        | NO  | FAO area absent    |
| 74 | <i>Thunnus alalunga</i>                                                            | <i>Thunnus alalunga</i>   | PAC-ME                      | NO  | Multiple FAO areas |
| 75 | <i>Thunnus alalunga</i>                                                            | <i>Thunnus alalunga</i>   | N.A.                        | NO  | FAO area absent    |
| 76 | <i>Thunnus alalunga</i>                                                            | <i>Thunnus alalunga</i>   | FAO 47                      | YES | All info required  |
| 77 | <i>Thunnus alalunga</i>                                                            | <i>Thunnus alalunga</i>   | FAO 47                      | YES | All info required  |

|    |                         |                         |        |     |                   |
|----|-------------------------|-------------------------|--------|-----|-------------------|
| 78 | <i>Thunnus alalunga</i> | <i>Thunnus alalunga</i> | FAO 47 | YES | All info required |
| 79 | <i>Thunnus alalunga</i> | <i>Thunnus alalunga</i> | FAO 47 | YES | All info required |
| 80 | <i>Thunnus alalunga</i> | <i>Thunnus alalunga</i> | FAO 47 | YES | All info required |

**Table S2.** BLAST algorithm output for species identification. The sample in bold corresponds to a supposedly mislabeled can. Samples in shaded only had the common name on the label, and not the scientific name.

| Sample    | Species on label                                                 | Genetic identity                | e-value         | Identity %   |
|-----------|------------------------------------------------------------------|---------------------------------|-----------------|--------------|
| 14        | <i>Thunnus albacares/obesus</i>                                  | <i>Thunnus albacares</i>        | 2.00E-39        | 96.26        |
| 15        | <i>Thunnus albacares/obesus</i>                                  | <i>Thunnus albacares</i>        | 7.00E-43        | 98.11        |
| 17        | <i>Atún Claro</i>                                                | <i>Thunnus albacares</i>        | 7.00E-43        | 98.11        |
| 19        | <i>Atún Claro</i>                                                | <i>Thunnus albacares</i>        | 7.00E-43        | 98.11        |
| 20        | <i>Thunnus albacares/obesus</i>                                  | <i>Thunnus albacares</i>        | 2.00E-44        | 99.06        |
| 21        | <i>Thunnus albacares/obesus</i>                                  | <i>Thunnus albacares</i>        | 1.00E-40        | 98.99        |
| 22        | <i>Thunnus albacares/obesus</i>                                  | <i>Thunnus albacares</i>        | 7.00E-43        | 98.11        |
| 23        | <i>Thunnus albacares/obesus</i>                                  | <i>Thunnus albacares</i>        | 3.00E-42        | 98.11        |
| 24        | <i>Atún Claro</i>                                                | <i>Thunnus albacares</i>        | 7.00E-43        | 98.11        |
| 25        | <i>Atún Claro</i>                                                | <i>Thunnus albacares</i>        | 2.00E-44        | 99.06        |
| 29        | <i>Thunnus albacares</i>                                         | <i>Thunnus albacares</i>        | 1.00E-41        | 97.22        |
| 30        | <i>Thunnus albacares</i>                                         | <i>Thunnus albacares</i>        | 3.00E-41        | 97.17        |
| <b>31</b> | <b><i>Thunnus obesus</i></b>                                     | <b><i>Thunnus albacares</i></b> | <b>2.00E-44</b> | <b>99.06</b> |
| 32        | <i>Thunnus albacares</i>                                         | <i>Thunnus albacares</i>        | 2.00E-44        | 99.06        |
| 51        | <i>Katsuwonus pelamis/ Thunnus obesus/<br/>Thunnus albacares</i> | <i>Katsuwonus pelamis</i>       | 2.00E-38        | 95.41        |
| 52        | <i>Katsuwonus pelamis/ Thunnus obesus/<br/>Thunnus albacares</i> | <i>Katsuwonus pelamis</i>       | 1.00E-41        | 97.22        |
| 53        | <i>Katsuwonus pelamis/ Thunnus obesus/<br/>Thunnus albacares</i> | <i>Katsuwonus pelamis</i>       | 4.00E-41        | 97.20        |
| 54        | <i>Katsuwonus pelamis/ Thunnus obesus/<br/>Thunnus albacares</i> | <i>Katsuwonus pelamis</i>       | 8.00E-43        | 98.13        |
| 55        | <i>Katsuwonus pelamis/ Thunnus obesus/<br/>Thunnus albacares</i> | <i>Katsuwonus pelamis</i>       | 7.00E-43        | 98.11        |
| 57        | <i>Katsuwonus pelamis</i>                                        | <i>Katsuwonus pelamis</i>       | 8.00E-43        | 98.13        |
| 58        | <i>Katsuwonus pelamis</i>                                        | <i>Katsuwonus pelamis</i>       | 3.00E-41        | 97.17        |
| 59        | <i>Katsuwonus pelamis</i>                                        | <i>Katsuwonus pelamis</i>       | 2.00E-44        | 99.06        |
| 60        | <i>Katsuwonus pelamis</i>                                        | <i>Katsuwonus pelamis</i>       | 3.00E-37        | 94.59        |
| 61        | <i>Thunnus alalunga</i>                                          | <i>Thunnus alalunga</i>         | 2.00E-33        | 93.46        |
| 76        | <i>Thunnus alalunga</i>                                          | <i>Thunnus alalunga</i>         | 4.00E-41        | 97.20        |
| 77        | <i>Thunnus alalunga</i>                                          | <i>Thunnus alalunga</i>         | 1.00E-41        | 97.17        |
| 78        | <i>Thunnus alalunga</i>                                          | <i>Thunnus alalunga</i>         | 2.00E-44        | 99.06        |
| 79        | <i>Thunnus alalunga</i>                                          | <i>Thunnus alalunga</i>         | 7.00E-43        | 98.11        |
| 80        | <i>Thunnus alalunga</i>                                          | <i>Thunnus alalunga</i>         | 7.00E-43        | 98.11        |

**Table S3.** Mean concentration of heavy metals for each sample. Each sample was measured three times. Results are given as mean metal content in µg/kg (SD in brackets). Arsenic value given here is prior to the 26% correction.

| Sample | Species                   | Capture zone | As               | Cd               | Cr               | Cu               | Hg               | Ni               | Pb              | Zn                 |
|--------|---------------------------|--------------|------------------|------------------|------------------|------------------|------------------|------------------|-----------------|--------------------|
| 14     | <i>Thunnus albacares</i>  | FAO 71       | 193.00<br>(3.30) | 32.61<br>(2.40)  | 19.95<br>(1.80)  | 356.71<br>(2.80) | 181.00<br>(2.80) | 188.28<br>(2.90) | 9.27<br>(1.50)  | 6522.81<br>(2.10)  |
| 15     | <i>Thunnus albacares</i>  | FAO 71       | 183.17<br>(2.60) | 15.04<br>(2.80)  | 154.54<br>(1.40) | 303.84<br>(1.50) | 71.16<br>(2.20)  | 236.25<br>(1.40) | 4.10<br>(3.80)  | 5410.76<br>(0.90)  |
| 17     | <i>Thunnus albacares</i>  | FAO 71       | 95.68<br>(2.70)  | 8.13<br>(3.30)   | 20.38<br>(4.90)  | 376.83<br>(2.30) | 68.95<br>(2.60)  | 160.96<br>(3.30) | 3.90<br>(2.60)  | 6048.63<br>(3.90)  |
| 19     | <i>Thunnus albacares</i>  | FAO 71       | 83.75<br>(0.80)  | 13.30<br>(1.50)  | 20.62<br>(1.40)  | 161.23<br>(3.10) | 174.43<br>(1.50) | 184.26<br>(1.40) | 3.08<br>(5.90)  | 6781.22<br>(0.20)  |
| 20     | <i>Thunnus albacares</i>  | FAO 71       | 189.18<br>(0.10) | 7.41<br>(2.20)   | 26.38<br>(1.50)  | 284.94<br>(0.10) | 41.60<br>(3.20)  | 198.94<br>(0.80) | 3.12<br>(0.40)  | 4343.52<br>(1.20)  |
| 21     | <i>Thunnus albacares</i>  | FAO 51       | 121.21<br>(2.30) | 9.24<br>(6.20)   | 16.69<br>(2.40)  | 252.49<br>(3.70) | 114.87<br>(2.20) | 150.86<br>(4.80) | 4.14<br>(2.10)  | 5241.25<br>(1.20)  |
| 22     | <i>Thunnus albacares</i>  | FAO 71       | 79.41<br>(3.10)  | 12.03<br>(7.50)  | 14.48<br>(9.70)  | 180.42<br>(7.50) | 122.84<br>(1.30) | 104.24<br>(5.50) | 5.35<br>(0.30)  | 4504.00<br>(4.90)  |
| 23     | <i>Thunnus albacares</i>  | FAO 71       | 213.06<br>(3.00) | 10.91<br>(2.60)  | 186.92<br>(1.80) | 354.78<br>(1.50) | 44.72<br>(3.90)  | 154.91<br>(4.70) | 5.16<br>(2.70)  | 5483.66<br>(1.70)  |
| 24     | <i>Thunnus albacares</i>  | FAO 71       | 108.04<br>(3.10) | 4.42<br>(3.60)   | 25.31<br>(6.00)  | 281.93<br>(4.20) | 42.18<br>(0.10)  | 91.98<br>(0.10)  | 2.46<br>(3.70)  | 3956.39<br>(1.70)  |
| 25     | <i>Thunnus albacares</i>  | FAO 51       | 254.04<br>(0.90) | 11.60<br>(3.40)  | 11.14<br>(1.30)  | 226.40<br>(2.30) | 107.18<br>(1.90) | 63.69<br>(4.70)  | 1.09<br>(3.60)  | 5102.44<br>(1.60)  |
| 29     | <i>Thunnus albacares</i>  | FAO 77       | 168.85<br>(1.80) | 11.07<br>(1.20)  | 19.26<br>(2.70)  | 190.07<br>(2.30) | 116.60<br>(3.60) | 160.66<br>(2.00) | 1.85<br>(5.40)  | 6412.23<br>(2.50)  |
| 30     | <i>Thunnus albacares</i>  | FAO 51       | 183.33<br>(1.20) | 11.84<br>(0.90)  | 29.54<br>(7.40)  | 326.81<br>(1.00) | 581.99<br>(1.20) | 104.68<br>(1.80) | 1.17<br>(4.40)  | 5136.20<br>(1.60)  |
| 31     | <i>Thunnus albacares</i>  | FAO 77       | 87.08<br>(3.30)  | 15.95<br>(1.00)  | 12.46<br>(3.30)  | 385.89<br>(1.80) | 232.21<br>(1.20) | 97.68<br>(3.70)  | 1.34<br>(11.80) | 5577.68<br>(0.70)  |
| 32     | <i>Thunnus albacares</i>  | FAO 71       | 301.51<br>(1.50) | 35.89<br>(1.40)  | 14.85<br>(8.20)  | 561.26<br>(2.90) | 237.78<br>(2.20) | 82.46<br>(6.60)  | 1.7<br>(15.50)  | 6084.24<br>(2.00)  |
| 51     | <i>Katsuwonus pelamis</i> | FAO 71       | 437.77<br>(1.40) | 12.49<br>(1.30)  | 12.25<br>(2.10)  | 350.79<br>(1.50) | 22.95<br>(3.00)  | 118.57<br>(0.20) | 2.16<br>(2.80)  | 5728.08<br>(1.20)  |
| 52     | <i>Katsuwonus pelamis</i> | FAO 71       | 318.27<br>(0.70) | 8.87<br>(3.60)   | 14.09<br>(1.00)  | 397.05<br>(3.00) | 22.57<br>(3.50)  | 72.00<br>(0.60)  | 1.30<br>(6.10)  | 6804.90<br>(1.80)  |
| 53     | <i>Katsuwonus pelamis</i> | FAO 71       | 339.98<br>(2.10) | 18.17<br>(2.60)  | 17.43<br>(3.30)  | 347.85<br>(1.40) | 22.21<br>(0.60)  | 116.06<br>(2.50) | 2.44<br>(3.80)  | 6766.64<br>(0.90)  |
| 54     | <i>Katsuwonus pelamis</i> | FAO 34       | 91.08<br>(1.50)  | 13.34<br>(3.70)  | 7.95<br>(10.00)  | 492.87<br>(3.70) | 230.55<br>(1.60) | 44.97<br>(1.70)  | 2.98<br>(2.60)  | 6860.23<br>(2.40)  |
| 55     | <i>Katsuwonus pelamis</i> | FAO 71       | 406.97<br>(1.30) | 14.80<br>(1.60)  | 10.89<br>(3.90)  | 403.72<br>(1.70) | 34.92<br>(3.60)  | 71.88<br>(0.90)  | 5.12<br>(1.20)  | 6412.64<br>(0.90)  |
| 57     | <i>Katsuwonus pelamis</i> | FAO 34       | 73.97<br>(1.90)  | 45.81<br>(2.90)  | 17.99<br>(1.80)  | 311.53<br>(2.00) | 181.76<br>(1.50) | 154.38<br>(3.70) | 2.26<br>(0.30)  | 10330.25<br>(1.50) |
| 58     | <i>Katsuwonus pelamis</i> | FAO 34       | 266.80<br>(3.10) | 116.67<br>(2.90) | 18.40<br>(2.50)  | 429.05<br>(1.50) | 56.61<br>(3.60)  | 91.51<br>(0.90)  | 3.80<br>(5.50)  | 7724.84<br>(1.30)  |
| 59     | <i>Katsuwonus pelamis</i> | FAO 34       | 212.61<br>(1.50) | 29.26<br>(3.20)  | 30.69<br>(2.70)  | 234.82<br>(1.00) | 157.91<br>(1.60) | 50.89<br>(2.40)  | 4.86<br>(4.00)  | 6122.73<br>(2.20)  |
| 60     | <i>Katsuwonus pelamis</i> | FAO 34       | 128.02<br>(1.50) | 24.92<br>(2.60)  | 13.89<br>(2.50)  | 263.20<br>(1.80) | 688.26<br>(0.30) | 137.94<br>(2.40) | 1.99<br>(4.70)  | 5552.20<br>(0.90)  |
| 61     | <i>Thunnus alalunga</i>   | FAO 77       | 517.28<br>(2.00) | 14.85<br>(1.90)  | 10.41<br>(4.20)  | 111.44<br>(1.50) | 478.72<br>(1.00) | 81.36<br>(3.20)  | 2.99<br>(8.70)  | 4217.03<br>(0.60)  |

|    |                         |        |                  |                 |                  |                  |                  |                  |                |                   |
|----|-------------------------|--------|------------------|-----------------|------------------|------------------|------------------|------------------|----------------|-------------------|
| 76 | <i>Thunnus alalunga</i> | FAO 47 | 117.55<br>(1.00) | 7.79<br>(1.50)  | 16.10<br>(4.70)  | 138.70<br>(3.80) | 310.12<br>(1.40) | 81.13<br>(4.30)  | 0.00<br>(N/A)  | 6915.58<br>(4.30) |
| 77 | <i>Thunnus alalunga</i> | FAO 47 | 129.31<br>(2.80) | 4.75<br>(4.20)  | 15.80<br>(3.10)  | 129.19<br>(3.20) | 234.85<br>(0.50) | 52.36<br>(4.00)  | 1.99<br>(0.30) | 6265.75<br>(0.40) |
| 78 | <i>Thunnus alalunga</i> | FAO 47 | 106.16<br>(3.40) | 10.52<br>(2.60) | 174.10<br>(1.40) | 217.32<br>(1.70) | 354.44<br>(1.00) | 320.01<br>(2.10) | 9.20<br>(1.50) | 7511.59<br>(0.20) |
| 79 | <i>Thunnus alalunga</i> | FAO 47 | 168.44<br>(1.60) | 11.57<br>(1.00) | 34.98<br>(3.10)  | 229.06<br>(1.80) | 322.72<br>(2.10) | 101.06<br>(0.20) | 3.42<br>(3.90) | 6162.70<br>(1.10) |
| 80 | <i>Thunnus alalunga</i> | FAO 47 | 144.72<br>(1.90) | 9.91<br>(1.10)  | 14.12<br>(0.80)  | 229.37<br>(2.80) | 287.33<br>(0.50) | 88.14<br>(0.90)  | 2.94<br>(2.10) | 7571.14<br>(1.50) |

**Table S4.** Mann-Whitney test results of the concentration of each heavy metal (µg/kg) for all groups studied. Numbers in bold are significantly different (significance level  $\alpha=0.05$ ).

| <b>Arsenic</b>  | <b>Thunnus 71</b> | <b>Katsuwonus 71</b> | <b>Thunnus 51</b> | <b>Thunnus 77</b> | <b>Katsuwonus 34</b> | <b>Thunnus 47</b> |
|-----------------|-------------------|----------------------|-------------------|-------------------|----------------------|-------------------|
| Thunnus 71      |                   | 0                    | 10                | 12                | 21                   | 19                |
| Katsuwonus 71   | <b>0.007</b>      |                      | 0                 | 4                 | 0                    | 0                 |
| Thunnus 51      | 0.579             | 0.052                |                   | 4                 | 6                    | 3                 |
| Thunnus 77      | 0.853             | 0.596                | 1                 |                   | 6                    | 5                 |
| Katsuwonus 34   | 0.894             | <b>0.020</b>         | 0.766             | 0.766             |                      | 12                |
| Thunnus 47      | 0.689             | <b>0.020</b>         | 0.233             | 0.551             | 1                    |                   |
| <b>Cadmium</b>  | Thunnus 71        | Katsuwonus 71        | Thunnus 51        | Thunnus 77        | Katsuwonus 34        | Thunnus 47        |
| Thunnus 71      |                   | 15                   | 11                | 10                | 7                    | 13                |
| Katsuwonus 71   | 0.700             |                      | 3                 | 5                 | 2                    | 3                 |
| Thunnus 51      | 0.712             | 0.377                |                   | 2                 | 0                    | 3                 |
| Thunnus 77      | 0.579             | 0.860                | 0.383             |                   | 2                    | 1                 |
| Katsuwonus 34   | <b>0.046</b>      | 0.066                | <b>0.037</b>      | 0.136             |                      | 0                 |
| Thunnus 47      | 0.230             | 0.111                | 0.233             | 0.074             | <b>0.012</b>         |                   |
| <b>Chromium</b> | Thunnus 71        | Katsuwonus 71        | Thunnus 51        | Thunnus 77        | Katsuwonus 34        | Thunnus 47        |
| Thunnus 71      |                   | 2                    | 9                 | 2                 | 11                   | 19                |
| Katsuwonus 71   | <b>0.017</b>      |                      | 4                 | 6                 | 6                    | 3                 |
| Thunnus 51      | 0.460             | 0.596                |                   | 3                 | 7                    | 6                 |
| Thunnus 77      | <b>0.042</b>      | 0.860                | 0.663             |                   | 6                    | 3                 |
| Katsuwonus 34   | 0.143             | 0.391                | 1.000             | 0.766             |                      | 9                 |
| Thunnus 47      | 0.689             | 0.111                | 0.766             | 0.233             | 0.531                |                   |
| <b>Copper</b>   | Thunnus 71        | Katsuwonus 71        | Thunnus 51        | Thunnus 77        | Katsuwonus 34        | Thunnus 47        |
| Thunnus 71      |                   | 10                   | 9                 | 10                | 20                   | 6                 |
| Katsuwonus 71   | 0.247             |                      | 0                 | 2                 | 8                    | 0                 |
| Thunnus 51      | 0.460             | 0.052                |                   | 3                 | 4                    | 2                 |
| Thunnus 77      | 0.579             | 0.216                | 0.663             |                   | 3                    | 7                 |
| Katsuwonus 34   | 0.790             | 0.713                | 0.371             | 0.233             |                      | 0                 |
| Thunnus 47      | <b>0.033</b>      | <b>0.020</b>         | 0.136             | 1                 | <b>0.012</b>         |                   |
| <b>Lead</b>     | Thunnus 71        | Katsuwonus 71        | Thunnus 51        | Thunnus 77        | Katsuwonus 34        | Thunnus 47        |
| Thunnus 71      |                   | 8                    | 6                 | 3                 | 14                   | 15                |
| Katsuwonus 71   | 0.143             |                      | 3                 | 5                 | 8                    | 9                 |
| Thunnus 51      | 0.196             | 0.377                |                   | 3                 | 4                    | 6                 |
| Thunnus 77      | 0.064             | 0.860                | 0.663             |                   | 3                    | 5                 |
| Katsuwonus 34   | 0.286             | 0.713                | 0.371             | 0.233             |                      | 11                |
| Thunnus 47      | 0.351             | 0.903                | 0.766             | 0.551             | 0.835                |                   |
| <b>Mercury</b>  | Thunnus 71        | Katsuwonus 71        | Thunnus 51        | Thunnus 77        | Katsuwonus 34        | Thunnus 47        |
| Thunnus 71      |                   | 0                    | 8                 | 5                 | 11                   | 1                 |
| Katsuwonus 71   | <b>0.007</b>      |                      | 0                 | 0                 | 0                    | 0                 |
| Thunnus 51      | 0.355             | 0.052                |                   | 3                 | 6                    | 5                 |
| Thunnus 77      | 0.139             | 0.052                | 0.663             |                   | 6                    | 5                 |
| Katsuwonus 34   | 0.143             | <b>0.020</b>         | 0.766             | 0.766             |                      | 5                 |
| Thunnus 47      | <b>0.005</b>      | <b>0.020</b>         | 0.551             | 0.551             | 0.144                |                   |

| <b>Nickel</b> | Thunnus 71   | Katsuwonus 71 | Thunnus 51   | Thunnus 77 | Katsuwonus 34 | Thunnus 47 |
|---------------|--------------|---------------|--------------|------------|---------------|------------|
| Thunnus 71    |              | 6             | 6            | 6          | 7             | 12         |
| Katsuwonus 71 | 0.076        |               | 6            | 4          | 10            | 10         |
| Thunnus 51    | 0.196        | 0.860         |              | 4          | 6             | 6          |
| Thunnus 77    | 0.196        | 0.596         | 1.000        |            | 5             | 6          |
| Katsuwonus 34 | <b>0.046</b> | 0.903         | 0.766        | 0.551      |               | 11         |
| Thunnus 47    | 0.182        | 0.903         | 0.766        | 0.766      | 0.835         |            |
| <b>Zinc</b>   | Thunnus 71   | Katsuwonus 71 | Thunnus 51   | Thunnus 77 | Katsuwonus 34 | Thunnus 47 |
| Thunnus 71    |              | 7             | 9            | 13         | 6             | 4          |
| Katsuwonus 71 | 0.105        |               | 0            | 1          | 7             | 6          |
| Thunnus 51    | 0.460        | 0.052         |              | 3          | 0             | 0          |
| Thunnus 77    | 1.000        | 0.112         | 0.663        |            | 3             | 2          |
| Katsuwonus 34 | <b>0.033</b> | 0.540         | <b>0.037</b> | 0.233      |               | 12         |
| Thunnus 47    | <b>0.016</b> | 0.391         | <b>0.037</b> | 0.136      | 1             |            |
